# Supplementary material for: Amorphous–crystalline FeNi2S4@NiFe–LDH nanograsses with molten salt as an industrially promising electrocatalyst for oxygen evolution
Source: Royal Society of Chemistry journal article supplement (doi:10.1039/d2qi00003b), 2022-01-01
Supplement: d2qi00003b1.pdf [file d2qi00003b1.pdf]

## Supplementary Information

### **Amorphous-crystalline FeNi<sub>2</sub>S<sub>4</sub>@NiFe-LDH nanograsses by molten salt as an industrially promising electrocatalyst for oxygen evolution**

Fu-Li Wang, Xin-Yu Zhang, Jian-Cheng Zhou, Zhuo-Ning Shi, Bin Dong \*,

Jing-Yi Xie, Yi-Wen Dong, Jian-Feng Yu, Yong-Ming Chai \*

*State Key Laboratory of Heavy Oil Processing, College of Chemistry & Chemical Engineering,*

*China University of Petroleum (East China), Qingdao 266580, PR China*

---

\* Corresponding author. Email: [dongbin@upc.edu.cn](mailto:dongbin@upc.edu.cn) (B. Dong); [ymchai@upc.edu.cn](mailto:ymchai@upc.edu.cn) (Y.M. Chai)

Tel: +86-532-86981156, Fax: +86-532-86981156

## 1. Experimental section

### 1.1. Characterizations

The X-ray powder diffraction (XRD) patterns were characterized by a JSM-7500F diffractometer produced by JEOL with Cu K  $\alpha$  radiation ( $2^\circ \text{ min}^{-1}$  from  $10^\circ$  to  $90^\circ$ ) to explore the relevant crystal structure. X-ray photoelectron spectroscopy (XPS) was measured by a VG ESCALABMK II system to analyze the chemical states of elements. The scanning electron microscopy (SEM) and SEM mapping analysis were performed with a Hitachi, S-4800 to investigate the morphology and element distribution. The high-resolution transmission electron microscopy (HRTEM) was carried out using a FEI Tecnai G2 F20 S-TWIN machine to observe more detailed lattice and structure information. The solid-liquid contact angle was investigated by an OCA20 machine. Electron paramagnetic resonance (EPR) was carried out by ADANI e-SPINOZA under the microwave power of 14 dB and modulation amplitude of 2.0 G. Inductively coupled plasma mass spectrometry (ICP-MS) characterization was adopted with a Thermo Fischer Scientific iCAP-QC. The  $\text{N}_2$  adsorption-desorption experiment was measured on Quantachrome NOVA 4200e.

### 1.2. Electrochemical measurements

All the OER electrochemical measurement was performed with an electrochemical workstation (Gamry Reference 3000, USA) in a standard three-electrode system using  $\text{FeNi}_2\text{S}_4@\text{NiFe-LDH}$  as the working electrode, a Pt foil electrode as the counter electrode and saturated calomel electrode as the reference electrode. In order to simulate industrial conditions, 1 M KOH ( $25^\circ \text{C}$ ) and 6 M KOH ( $70^\circ \text{C}$ ) has been

used as electrolyte. Linear sweep voltammetry (LSV) was recorded at a scan rate of 2 mV s<sup>-1</sup>, and the potential range was 0 - 0.7 V vs SCE. All potentials reported has been calibrated to reversible hydrogen electrode (RHE). When the electrolyte required was 1 M KOH (25 °C), the Nernst equation could be expressed as  $E_{RHE} = E_{SCE} + 0.059\text{pH} + 0.245$ . When the electrolyte required was 6 M KOH (70 °C), the pH value is 14.78 and the corresponding Nernst equation could be expressed as  $E_{RHE} = E_{SCE} + 0.059\text{pH} + 0.219$ . The electrochemical ohmic resistance (EIS) was evaluated at the potential of 0.4 V vs SCE. The electrochemical active surface areas (ECSAs) were calculated from electric double layer capacitance ( $C_{dl}$ ) which was determined by the measurements of cyclic voltammetry (CV) in a potential range of 0.3 - 0.4 V (vs SCE) at a scan rate range of 5-20 mV s<sup>-1</sup>. The ECSA is proportional to  $C_{dl}$  based on  $ECSA=C_{dl}/C_s$ , where  $C_s$  is the specific capacitance and is considered to be a constant, which is reported to be between 0.022 and 0.130 mF cm<sup>-2</sup> in alkaline solution. In this study, we assumed the value of  $C_s$  to be 0.040 mF cm<sup>-2</sup> in 1 M KOH. The stability test of catalysts was analyzed by a V-t curve, where the constant current was 400 and 500 mA cm<sup>-2</sup>, respectively. The stability tests were conducted by three ways: (i) accelerating degradation test (ADT) for 5000 cycles at a scan rate of 40 mV s<sup>-1</sup>, (ii) simulated intermittent condition by applied the current density from 200 until 1000 mA cm<sup>-2</sup> with an increment of 100 mA cm<sup>-2</sup> every 600 s and returned back to 200 mA cm<sup>-2</sup>, (iii) chronopotentiometry measurement at a fixed current density of 500 mA cm<sup>-2</sup> for 600 h.

**Fig. S1**

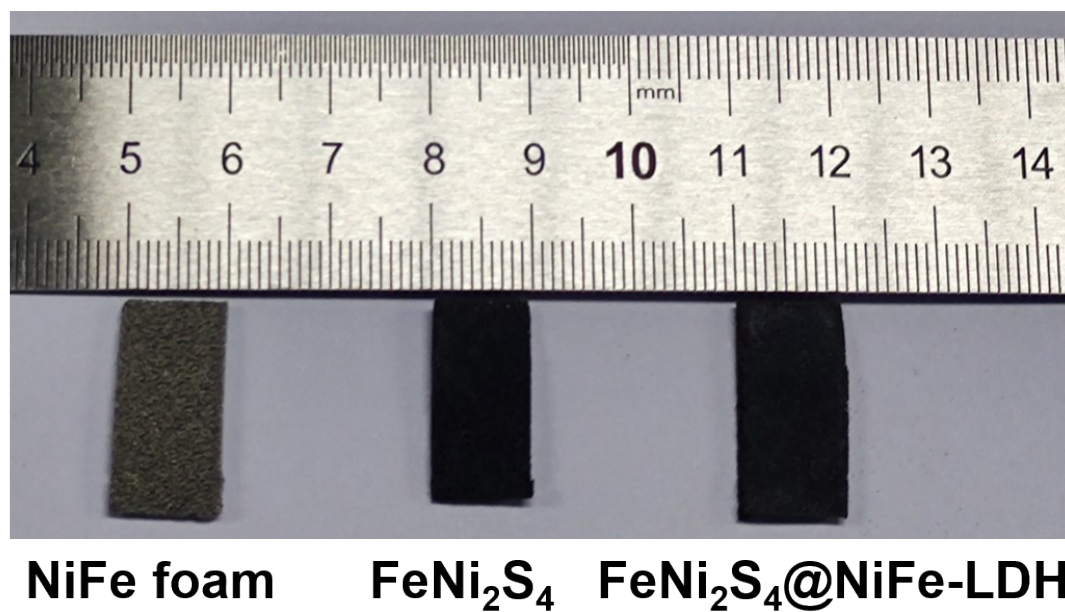

**Fig. S1.** Optical photograph (from left to right) of NiFe foam, FeNi<sub>2</sub>S<sub>4</sub>, FeNi<sub>2</sub>S<sub>4</sub>@NiFe-LDH.

Fig. S2

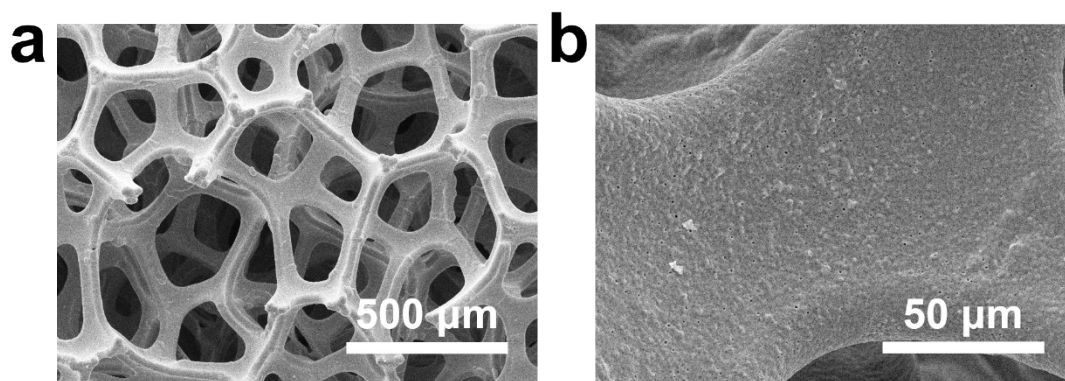

Fig. S2. SEM images of NiFe foam.

**Fig. S3**

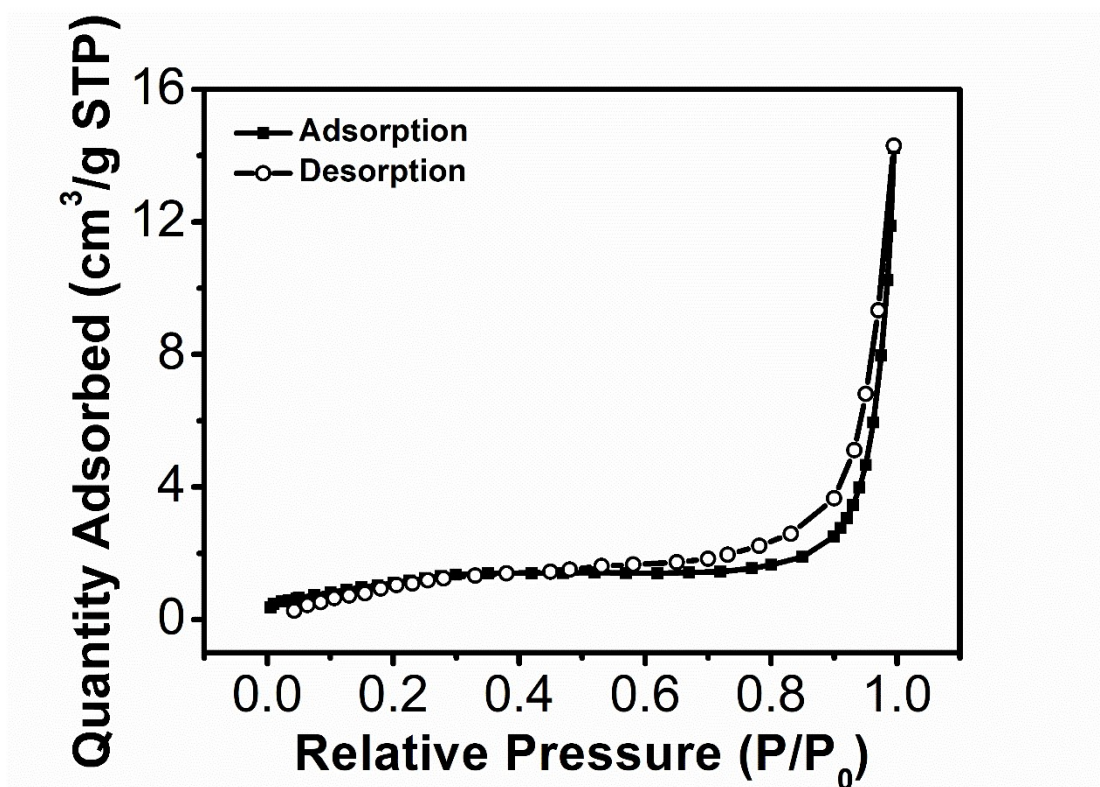

**Fig. S3. N<sub>2</sub> adsorption-desorption isotherms of FeNi<sub>2</sub>S<sub>4</sub>@NiFe-LDH.**

**Fig. S4**

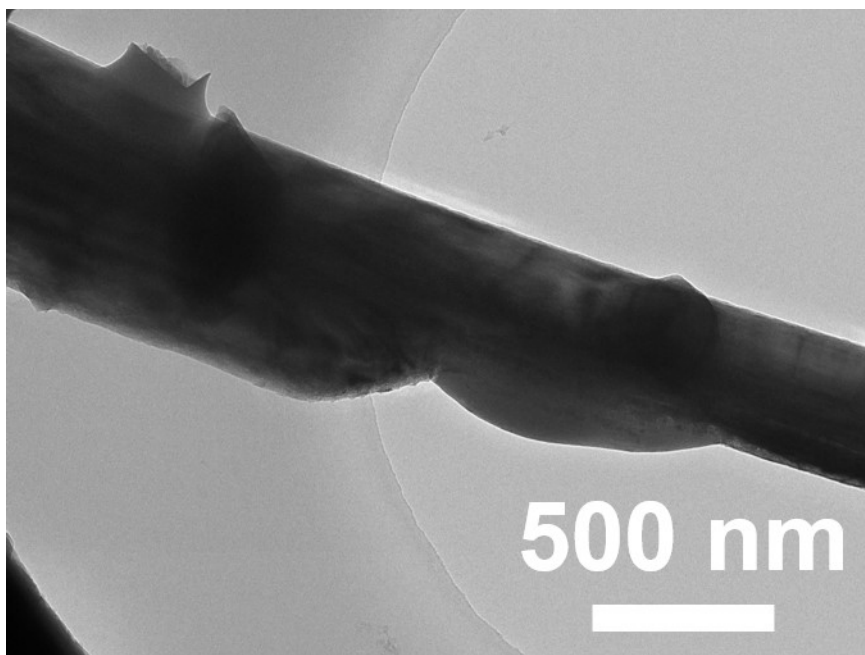

**Fig. S4.** TEM images of FeNi<sub>2</sub>S<sub>4</sub>.

Fig. S5

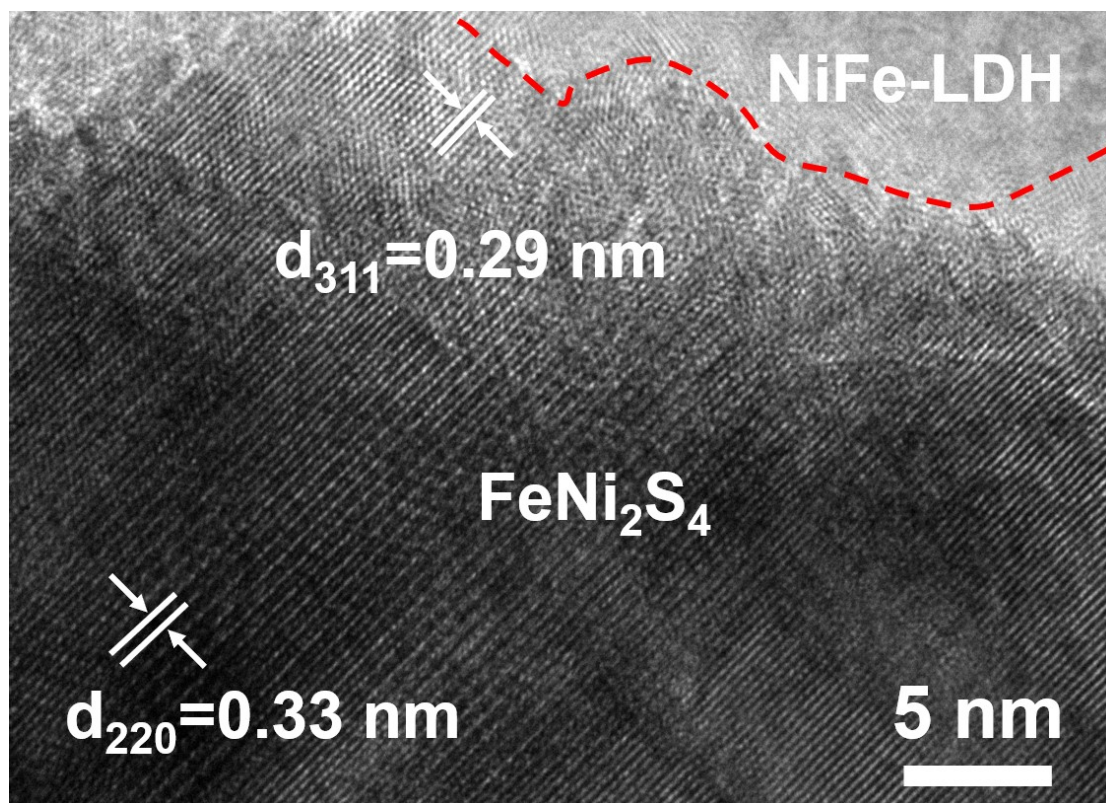

Fig. S5. high-resolution TEM images of FeNi<sub>2</sub>S<sub>4</sub>.



Fig. S6

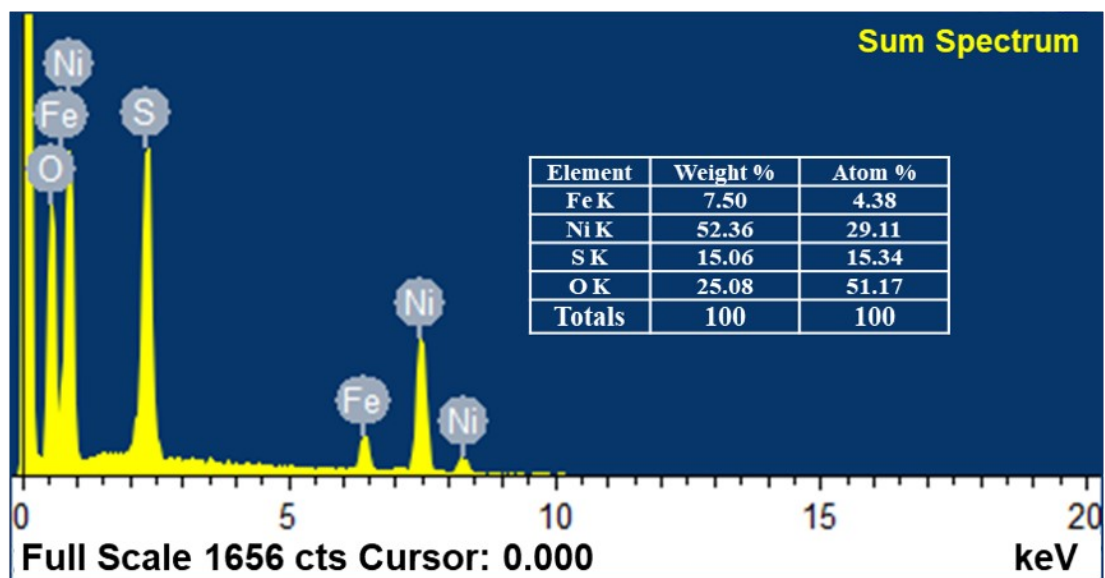

Fig. S6. SEM-EDX spectrum for the  $\text{FeNi}_2\text{S}_4@\text{NiFe-LDH}$ .

Fig. S7

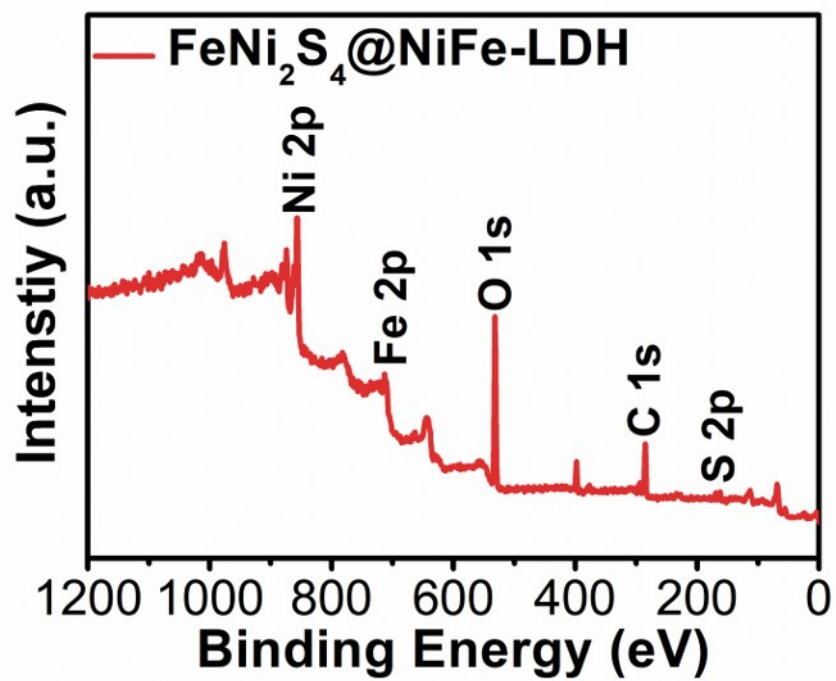

Fig. S7. overall XPS spectra for the FeNi<sub>2</sub>S<sub>4</sub>@NiFe-LDH.

**Fig. S8**

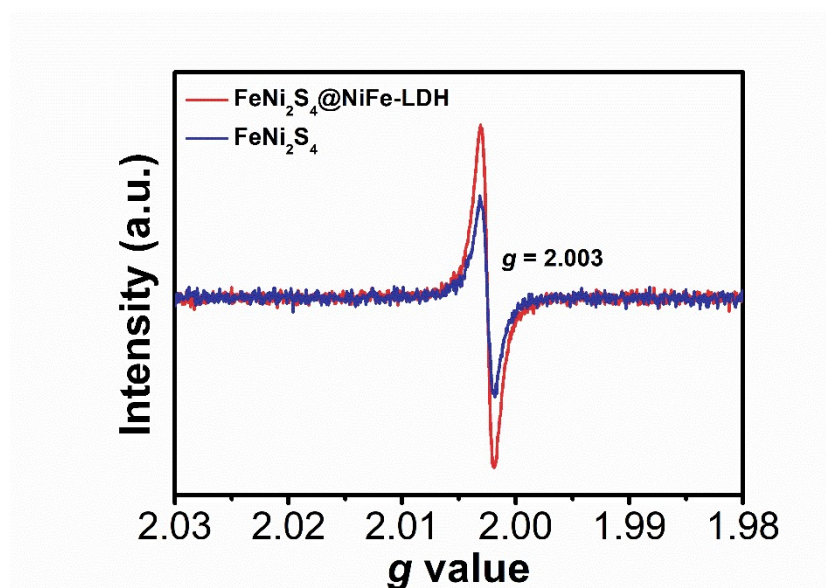

**Fig. S8.** The EPR spectra of powder FeNi<sub>2</sub>S<sub>4</sub>@NiFe-LDH and FeNi<sub>2</sub>S<sub>4</sub> peeled off from the NiFe foam.

**Fig. S9**

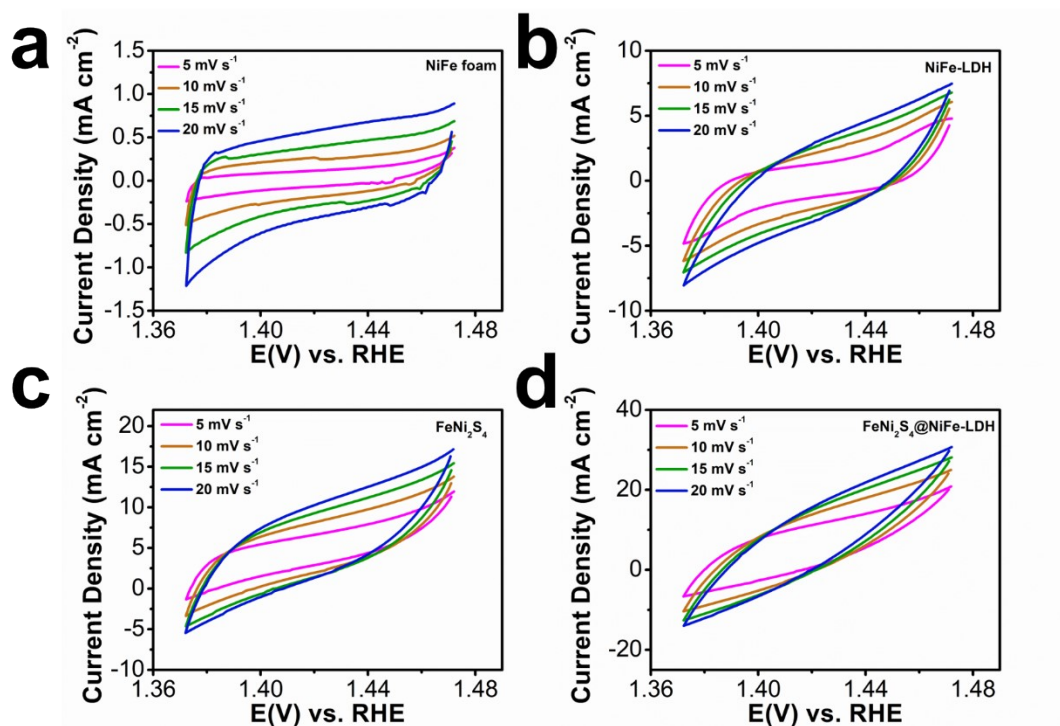

**Fig. S9.** Cyclic voltammetry curves (CVs) of NiFe foam (a), NiFe-LDH (b), FeNi<sub>2</sub>S<sub>4</sub> (c) and FeNi<sub>2</sub>S<sub>4</sub>@NiFe-LDH (d) with different scanning rates (5, 10, 15, 20 mV s<sup>-1</sup>) in the potential range of 1.37~ 1.47 V (vs. RHE).

**Fig. S10**

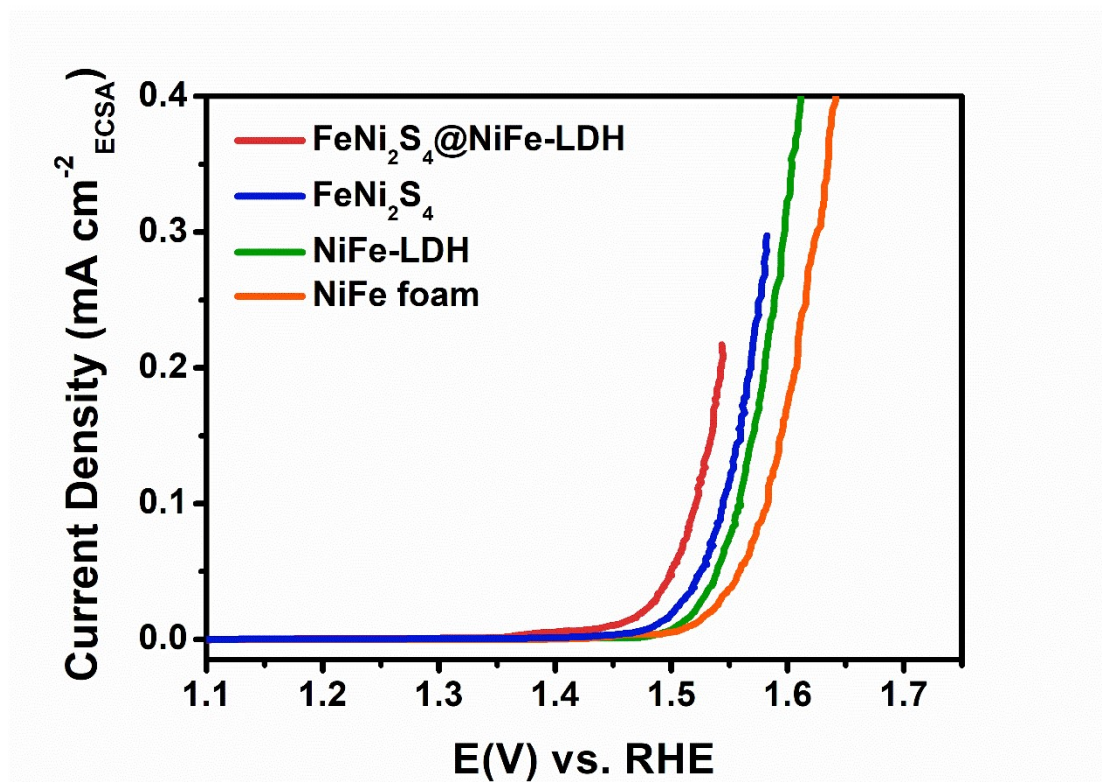

**Fig. S10.** OER polarization curves normalized by electrochemically active surface area (ECSA) for FeNi<sub>2</sub>S<sub>4</sub>@NiFe-LDH, FeNi<sub>2</sub>S<sub>4</sub>, NiFe-LDH and NiFe foam.

**Fig. S11**

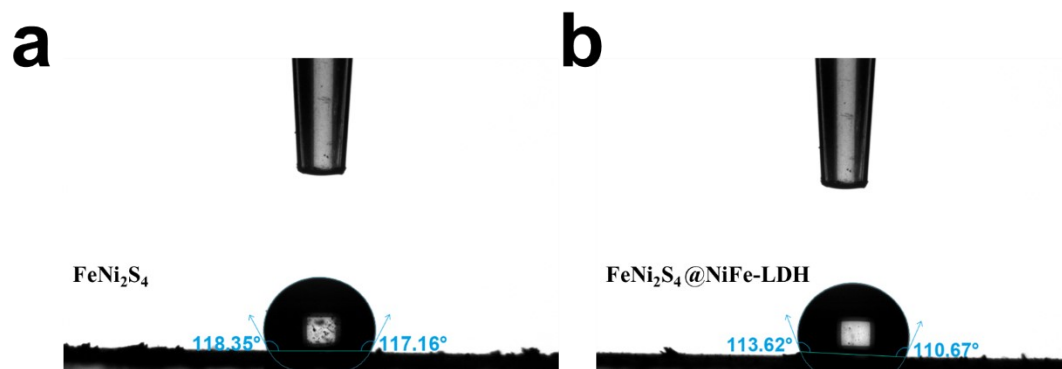

**Fig. S11.** The solid-liquid contact angles of (a)  $\text{FeNi}_2\text{S}_4$  and (b)  $\text{FeNi}_2\text{S}_4 @ \text{NiFe-LDH}$ .

**Fig. S12**

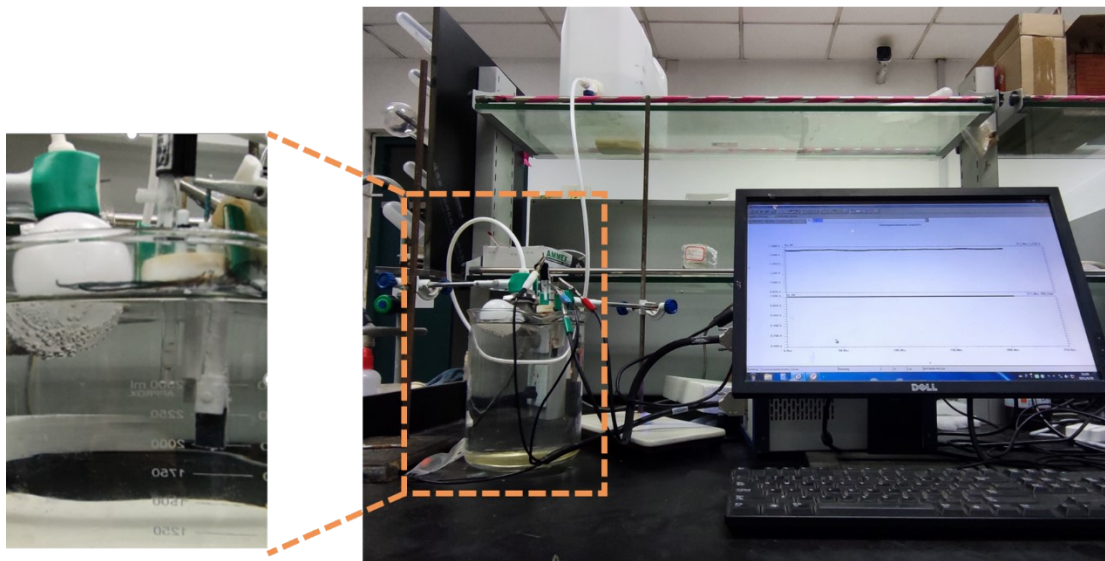

**Fig. S12.** Photograph of the setup with automatic rehydration system for a long-time stability test by chronopotentiometry at  $500 \text{ mA cm}^{-2}$ , using electrochemical workstation (Gamry Reference 3000, USA).

**Fig. S13**

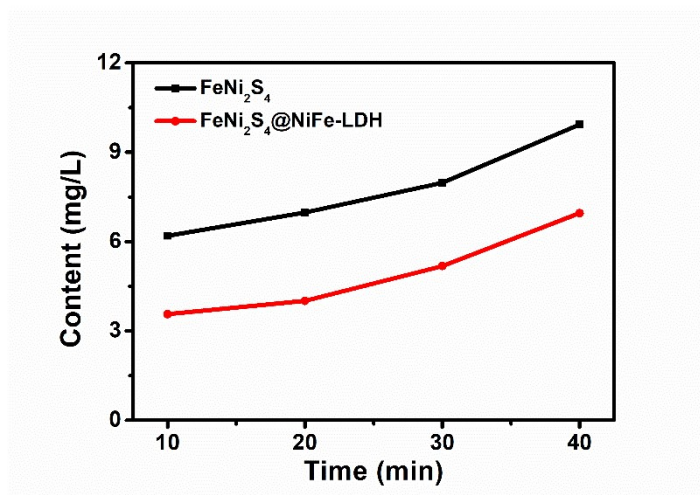

**Fig. S13.** S content in 1 M KOH of FeNi<sub>2</sub>S<sub>4</sub>@NiFe-LDH and FeNi<sub>2</sub>S<sub>4</sub> under 100 mA cm<sup>-2</sup>.



**Fig. S14**

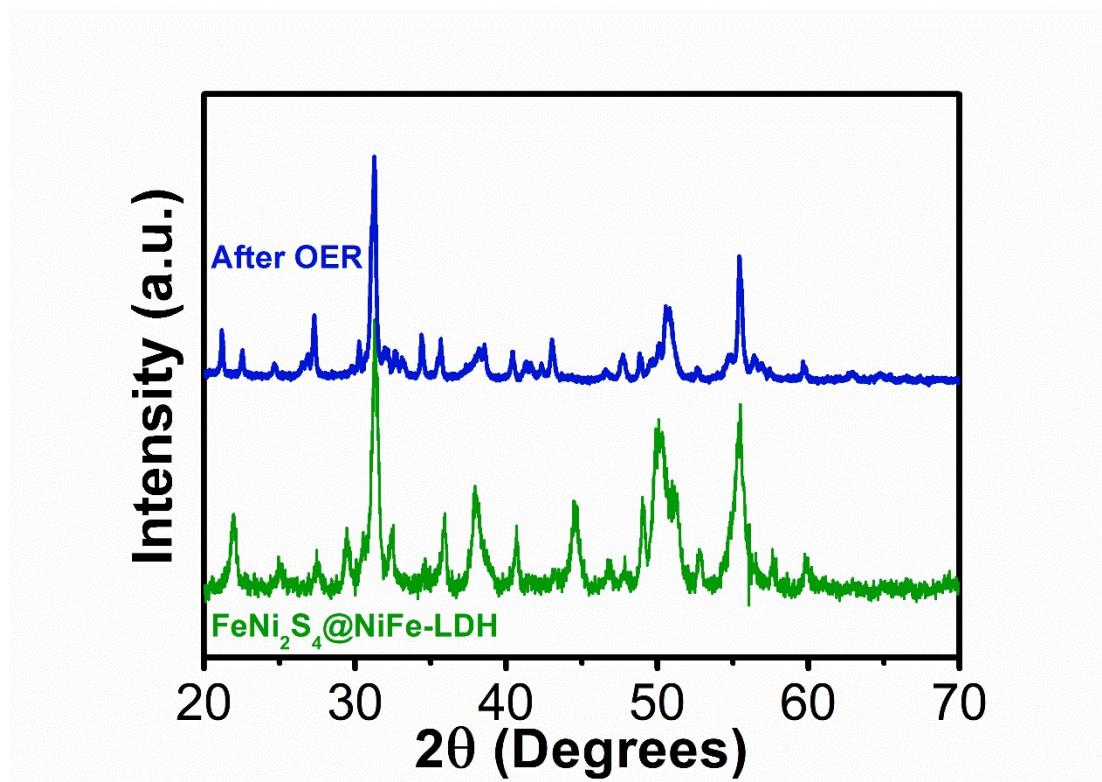

**Fig. S14.** XRD pattern of FeNi<sub>2</sub>S<sub>4</sub>@NiFe-LDH before and after long-term OER process.

**Table S1.** Elemental valence states of Fe and Ni species in the FeNi<sub>2</sub>S<sub>4</sub>@NiFe-LDH and their relative percentage ratios based on the deconvolution of peak areas.

| Catalysts                                  | Peak area ratio of                  |
|--------------------------------------------|-------------------------------------|
|                                            | Fe species (%)                      |
|                                            | Fe <sup>2+</sup> / Fe <sup>3+</sup> |
| FeNi <sub>2</sub> S <sub>4</sub>           | 53.7 / 46.3                         |
| FeNi <sub>2</sub> S <sub>4</sub> @NiFe-LDH | 26.6 / 73.4                         |

Note: The ratios of elemental valence states calculated by the deconvoluted peak areas from XPS

**Table S2.** OER performances of FeNi<sub>2</sub>S<sub>4</sub>@NiFe-LDH and other reported electrocatalysts in alkaline media.

| Catalyst                                      | Electrolyte    | $\eta@j$ (mA cm <sup>-2</sup> ) | Ref.             |
|-----------------------------------------------|----------------|---------------------------------|------------------|
|                                               |                | <b>238 mV@100</b>               |                  |
| <b>FeNi<sub>2</sub>S<sub>4</sub>@NiFe-LDH</b> | <b>1 M KOH</b> | <b>283 mV@500</b>               | <b>This work</b> |
|                                               |                | <b>306 mV@1000</b>              |                  |
| Ta-NiFe LDH                                   | 1 M KOH        | 260 mV@50                       | [1]              |
| Nb-NiFe-LDH                                   | 1 M KOH        | 242 mV@50                       | [2]              |
| FeNi LDH                                      | 1 M KOH        | 240 mV@50                       | [3]              |
| Ni(Fe)OOH-FeS <sub>x</sub>                    | 1 M KOH        | 300 mV@50                       | [4]              |
| S-NiFe-LDH-t-A                                | 1 M KOH        | 270 mV@50                       | [5]              |
|                                               |                | 260 mV@50                       |                  |
| S-(Ni,Fe)OOH                                  | 1 M KOH        | 281 mV@100                      | [6]              |
|                                               |                | 350 mV@100                      |                  |
| NiFeOH                                        | 1 M KOH        | 350 mV@100                      | [7]              |
| F-NiFe-A                                      | 1 M KOH        | 240 mV@50                       | [8]              |
| S-Ni <sub>3</sub> FeN/NSG31.3                 | 1 M KOH        | 360 mV@50                       | [9]              |
| P-FeNiO/CNS                                   | 1 M KOH        | 300 mV@100                      | [10]             |
|                                               |                | 250 mV@50                       |                  |
| Ni <sub>3</sub> Se <sub>4</sub> @NiFe LDH/CFC | 1 M KOH        | 290 mV@100                      | [11]             |

**Table S3.**  $C_{dl}$  and ECSA surface area of all the as-obtained catalysts.

| <b>Catalyst</b>                            | <b><math>C_{dl}</math> (mF)</b> | <b>ECSA (cm<sup>2</sup>)</b> |
|--------------------------------------------|---------------------------------|------------------------------|
| FeNi <sub>2</sub> S <sub>4</sub> @NiFe-LDH | 248.41                          | 6,210.25                     |
| FeNi <sub>2</sub> S <sub>4</sub>           | 172.41                          | 4,310.25                     |
| NiFe-LDH                                   | 110.65                          | 2,766.25                     |
| NiFe foam                                  | 26.92                           | 673                          |

## References

- [1] X. Wang, Y. Tuo, Y. Zhou, D. Wang, S. Wang and J. Zhang, Ta-doping triggered electronic structural engineering and strain effect in NiFe LDH for enhanced water oxidation, *Chem. Eng. J.*, 2021, **403**, 126297.
- [2] Y.N. Zhou, F.L. Wang, S.Y. Dou, Z.N. Shi, B. Dong, W.L. Yu, H.Y. Zhao, F.G. Wang, J.F. Yu and Y.M. Chai, Motivating high-valence Nb doping by fast molten salt method for NiFe hydroxides toward efficient oxygen evolution reaction, *Chem. Eng. J.*, 2022, **427**, 131643.
- [3] Q. Xiang, F. Li, W. Chen, Y. Ma, Y. Wu, X. Gu, Y. Qin, P. Tao, C. Song, W. Shang, H. Zhu, T. Deng and J. Wu, In situ vertical growth of Fe–Ni layered double-hydroxide arrays on Fe–Ni alloy foil: interfacial layer enhanced electrocatalyst with small overpotential for oxygen evolution reaction, *ACS Energy Lett.*, 2018, **3**, 2357–2365.
- [4] H. Yang, L. Gong, H. Wang, C. Dong, J. Wang, K. Qi, H. Liu, X. Guo and B. Y. Xia, Preparation of nickel-iron hydroxides by microorganism corrosion for efficient oxygen evolution, *Nat. Commun.*, 2020, **11**, 5075.
- [5] Y.N. Zhou, W.L. Yu, Y.N. Cao, J. Zhao, B. Dong, Y. Ma, F.L. Wang, R.Y. Fan, Y.L. Zhou and Y.M. Chai, S-doped nickel-iron hydroxides synthesized by room-temperature electrochemical activation for efficient oxygen evolution, *Appl. Catal. B Environ. Appl. Catal. B Environ.*, 2021, **292**, 120150.
- [6] L. Yu, L. Wu, B. McElhenny, S. Song, D. Luo, F. Zhang, Y. Yu, S. Chen and Z. Ren, Ultrafast room-temperature synthesis of porous S-doped Ni/Fe (oxy)hydroxide

- electrodes for oxygen evolution catalysis in seawater splitting, *Energy Environ. Sci.*, 2020, **13**, 3439–3446.
- [7] Q. Zhou, Y. Chen, G. Zhao, Y. Lin, Z. Yu, X. Xu, X. Wang, H. K. Liu, W. Sun and S. X. Dou, Active-site-enriched iron-doped nickel/cobalt hydroxide nanosheets for enhanced oxygen evolution reaction, *ACS Catal.*, 2018, **8**, 5382–5390.
- [8] Q. Xu, H. Jiang, X. Duan, Z. Jiang, Y. Hu, S. W. Boettcher, W. Zhang, S. Guo and C. Li, Fluorination-enabled reconstruction of NiFe electrocatalysts for efficient water oxidation, *Nano Lett.*, 2021, **21**, 492–499.
- [9] C. Lai, M. Gong, Y. Zhou, J. Fang, L. Huang, Z. Deng, X. Liu, T. Zhao, R. Lin, K. Wang, K. Jiang, H. Xin and D. Wang, Sulphur modulated Ni<sub>3</sub>FeN supported on N/S co-doped graphene boosts rechargeable/flexible Zn-air battery performance, *Appl. Catal. B Environ.*, 2020, **274**, 119086.
- [10] Z. Liu, B. Tang, X. Gu, H. Liu and L. Feng, Selective structure transformation for NiFe/NiFe<sub>2</sub>O<sub>4</sub> embedded porous nitrogen-doped carbon nanosphere with improved oxygen evolution reaction activity, *Chem. Eng. J.*, 2020, **395**, 125170.
- [11] T. Zhang, L. Hang, Y. Sun, D. Men, X. Li, L. Wen, X. Lyu and Y. Li, Hierarchical hetero-Ni<sub>3</sub>Se<sub>4</sub>@NiFe LDH micro/nanosheets as efficient bifunctional electrocatalysts with superior stability for overall water splitting, *Nanoscale Horiz.*, 2019, **4**, 1132–1138.
